# Supplementary material
Source: MDPI journal article supplement (https://www.mdpi.com/2072-4292/8/1/62)
Supplement: s1 [file s1]

# Supplementary Materials: Quantifying Multi-Decadal Change of Planted Forest Cover Using Airborne LiDAR and Landsat Imagery

Xiaoyi Wang, Huabing Huang, Peng Gong, Gregory S. Biging, Qinchuan Xin, Yanlei Chen, Jun Yang and Caixia Liu

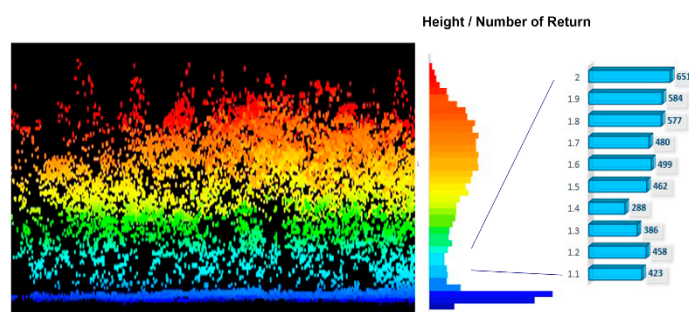

**Figure S1.** Number of return statistics. The area is approximately 0.2 km<sup>2</sup>, and contains both afforestation and native forest area.

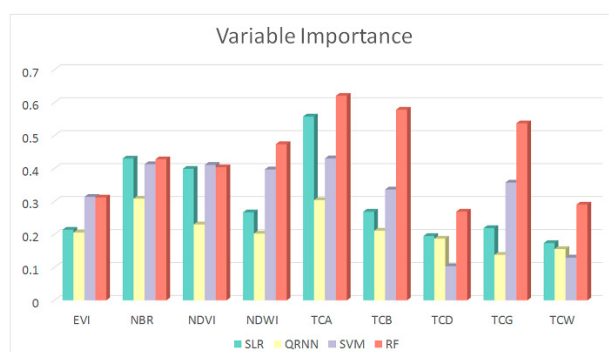

**Figure S2.** Variable importance of the contribution of all nine features to general regression.
